# Supplementary material for: Combination Therapy of Mesenchymal Stromal Cells and Interleukin-4 Attenuates Rheumatoid Arthritis in a Collagen-Induced Murine Model
Source: MDPI journal article supplement (doi:10.3390/cells8080823), 2019-08-03
Supplement: s1 [file s1]

## Supplementary Materials

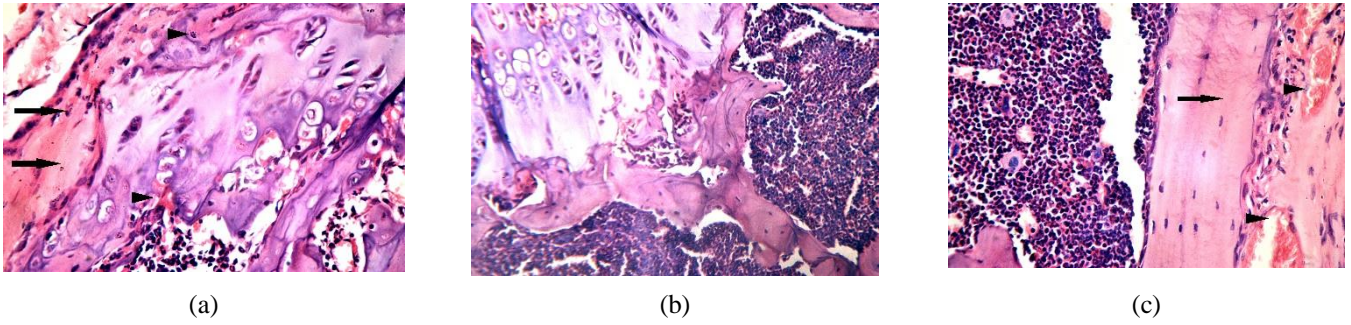

**Figure S1.** Histopathological changes and severity of arthritis in current CIA murine model: (a) Severe; (b) Moderate; and (c) Mild CIA in mice.
